# Supplementary material
Source: PubMed Central journal article supplement (PMC6892187)

KHSRP expression (Log RNA Seq V2)

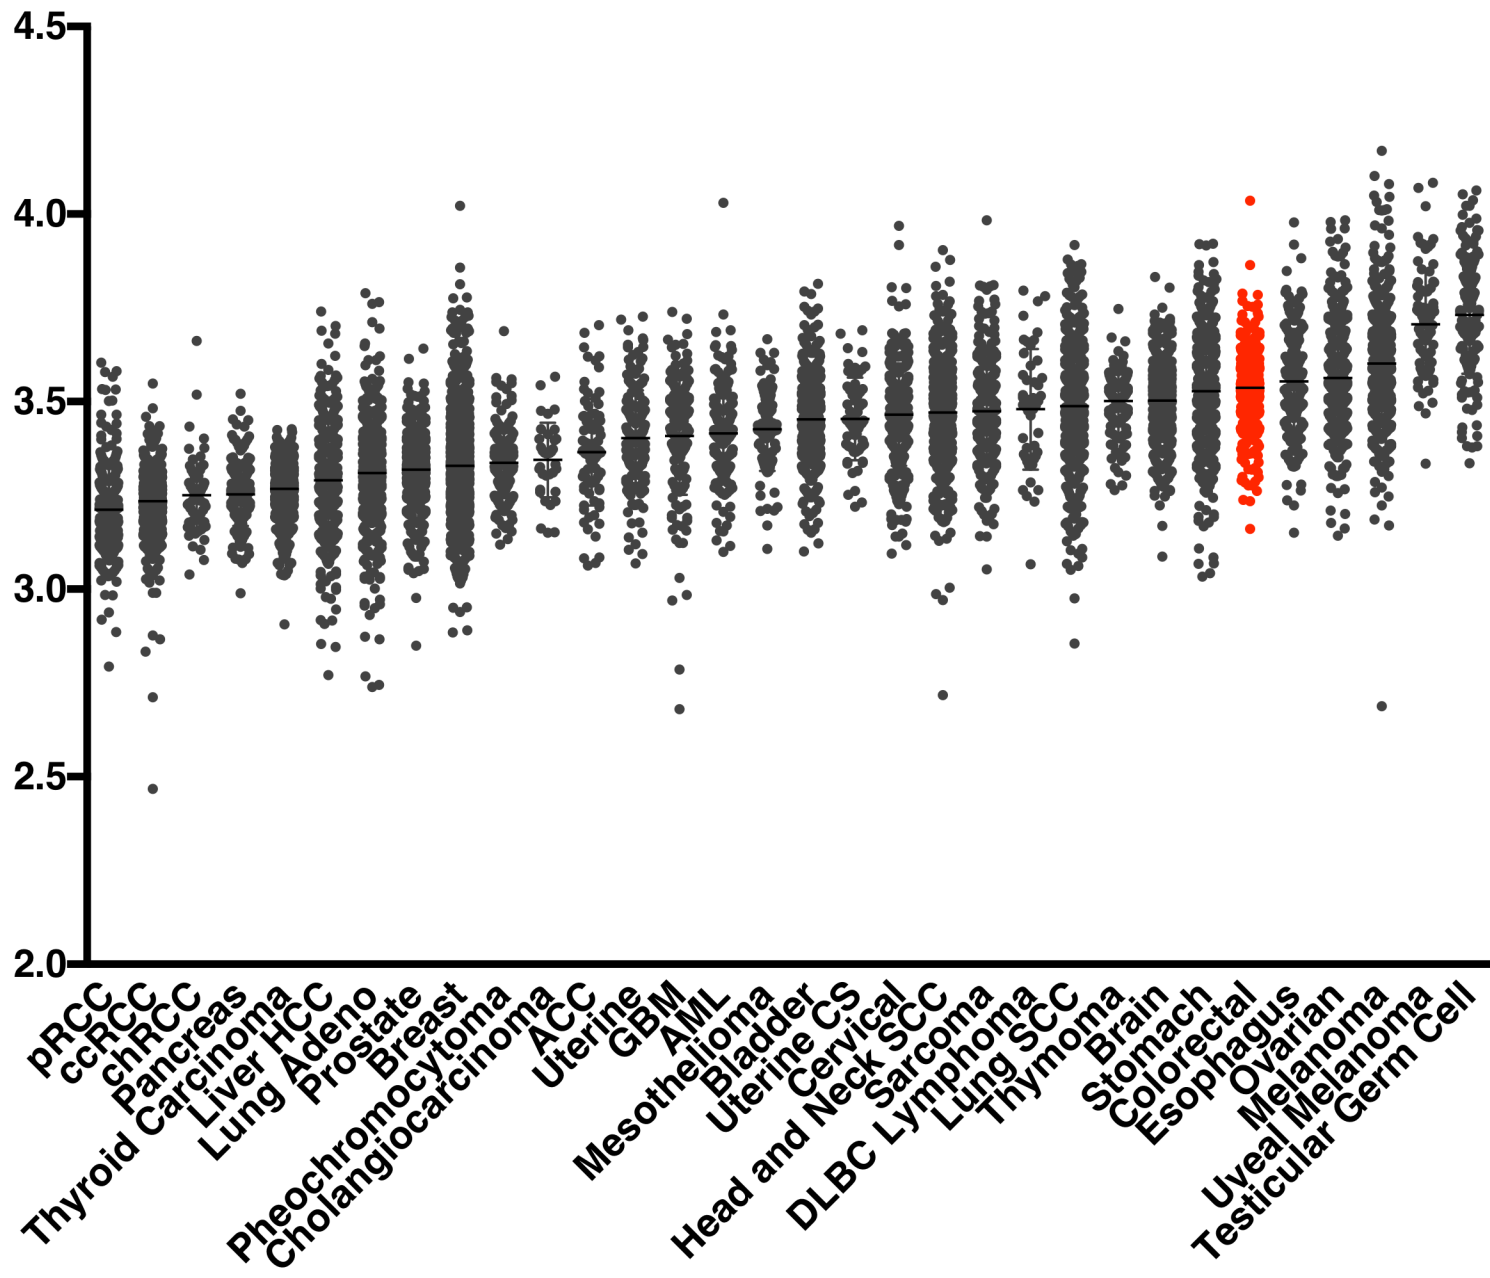

Supplement: mmc1.pdf [file mmc1.pdf]

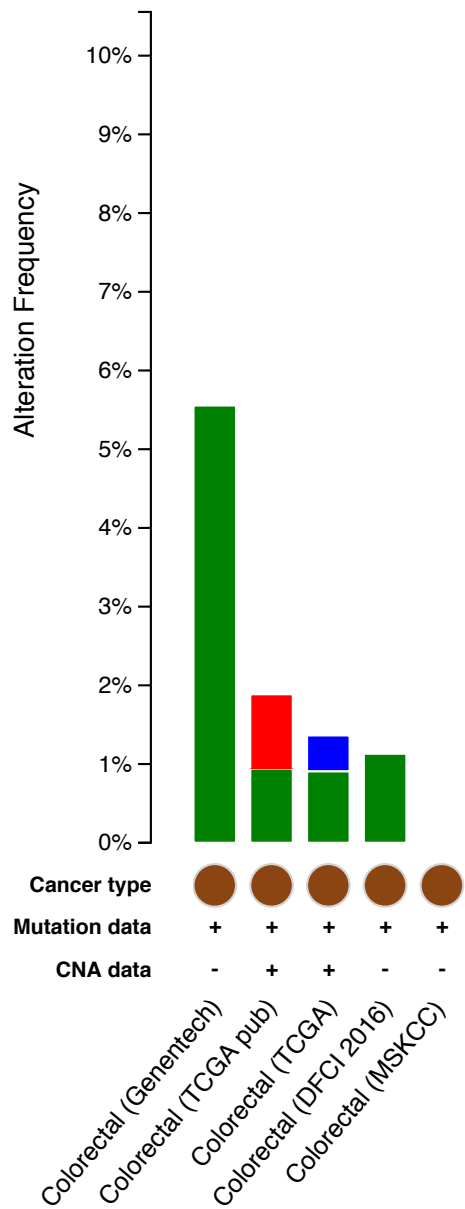

■ Mutation    
 ■ Deletion    
 ■ Amplification

Supplement: mmc2.pdf [file mmc2.pdf]

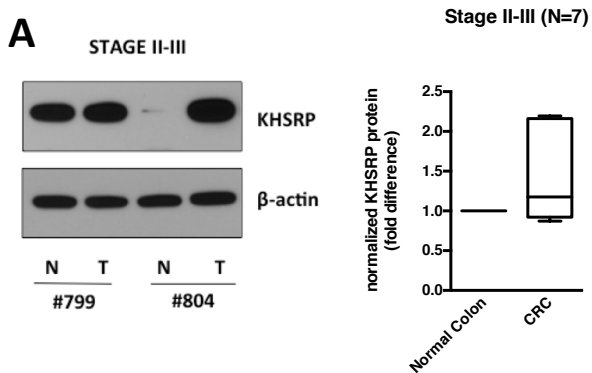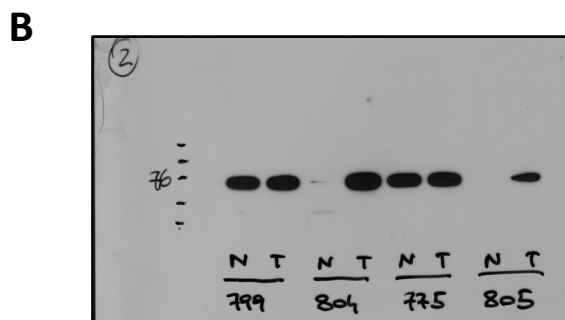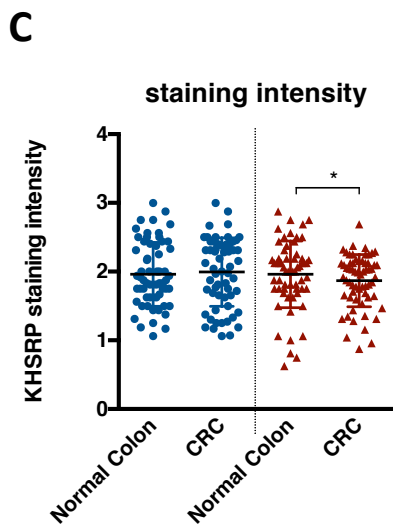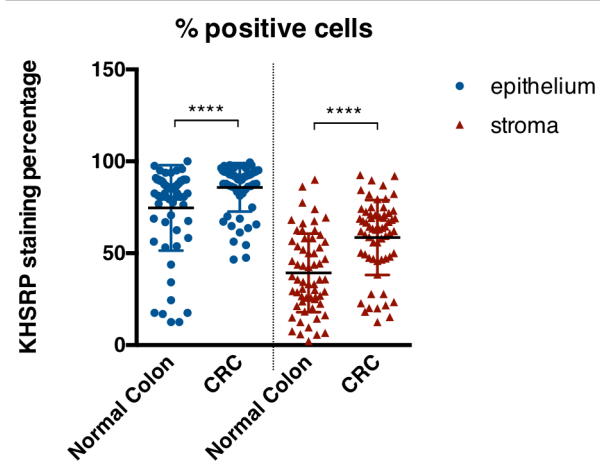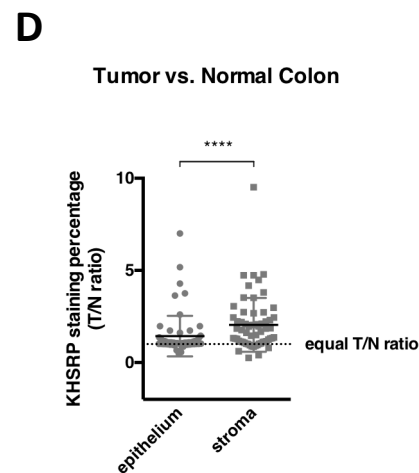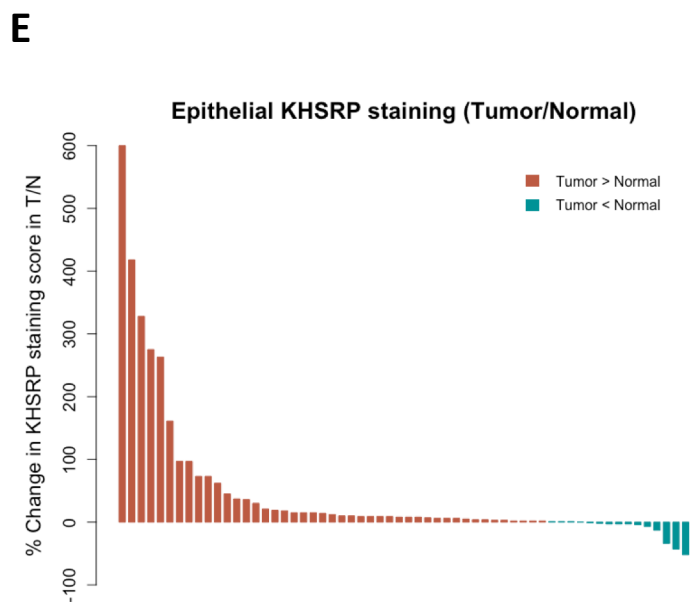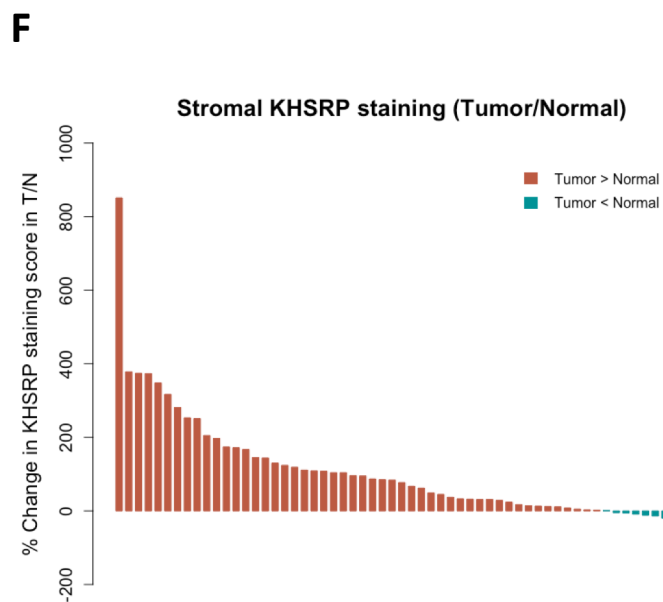

Supplement: mmc3.pdf [file mmc3.pdf]

**A**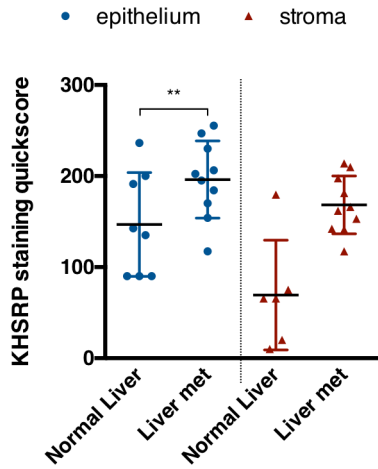**B**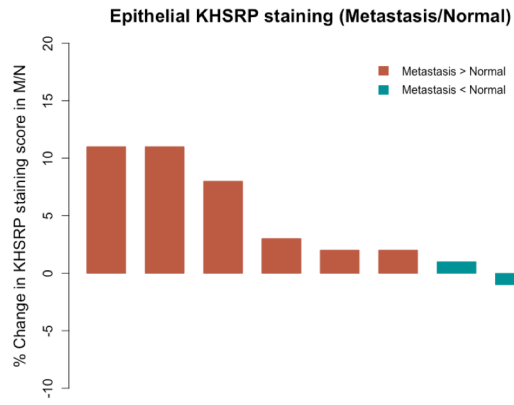**C**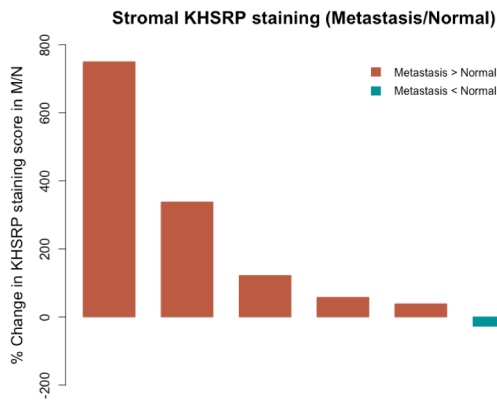**D**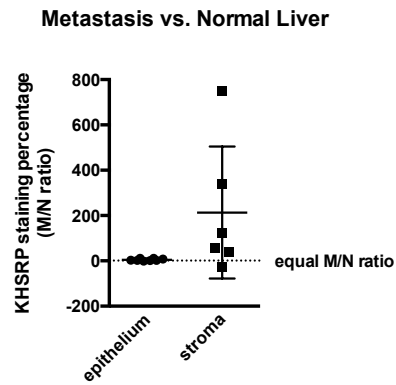**E**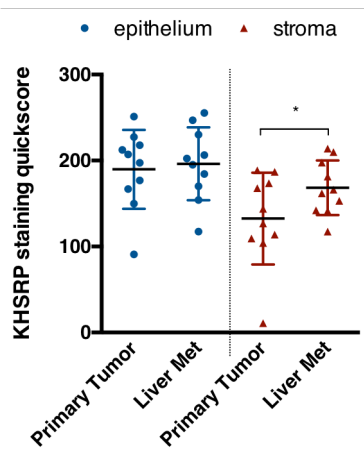**F**

Primary vs. Liver Metastasis (epithelium)

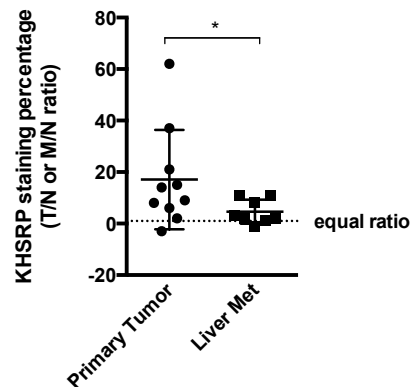

Primary vs. Liver Metastasis (stroma)

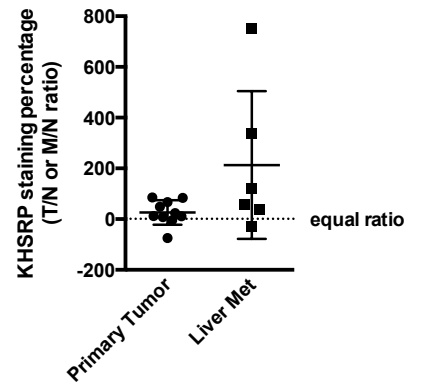

Supplement: mmc4.pdf [file mmc4.pdf]

**A**

DAPI

KHSRP

Phalloidin

Merge

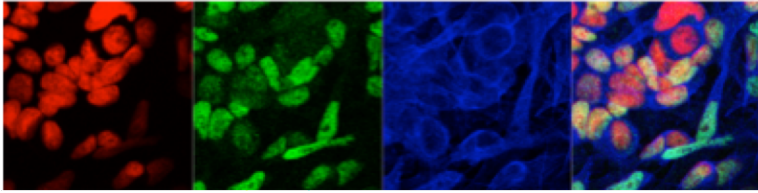

**B**

DAPI

KHSRP

Phalloidin

Merge

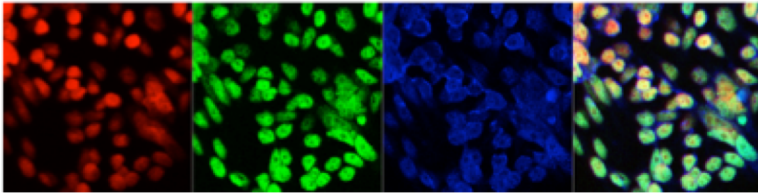

Supplement: mmc5.pdf [file mmc5.pdf]

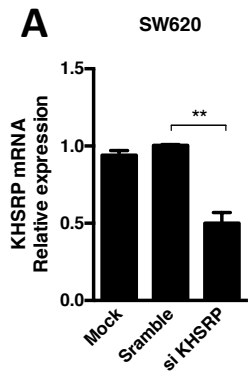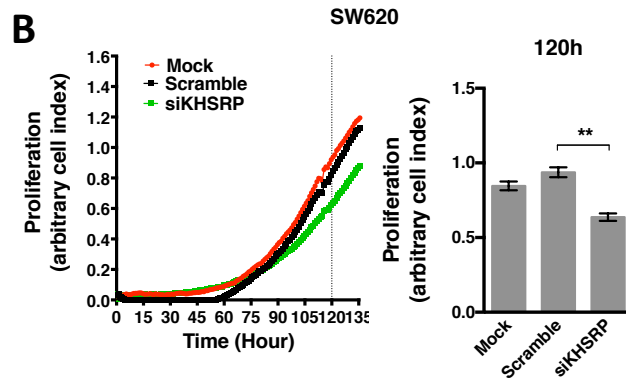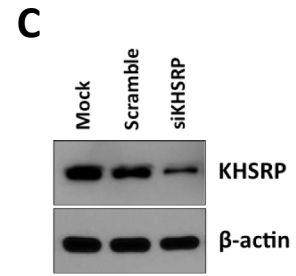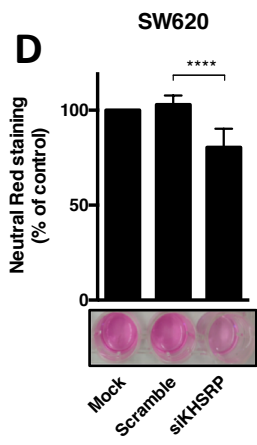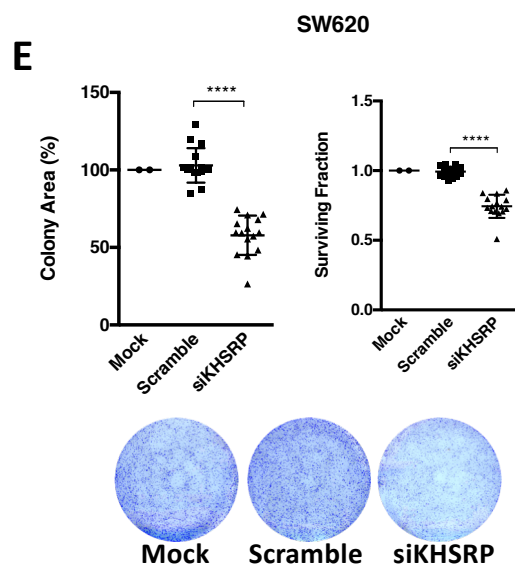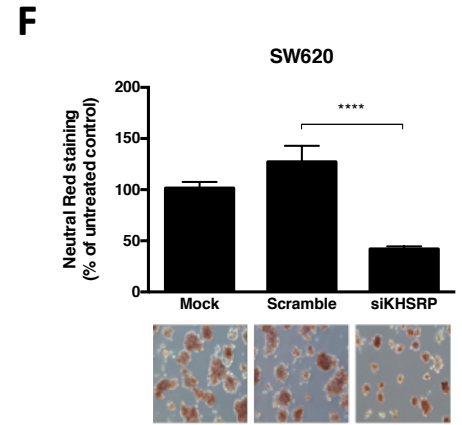

Supplement: mmc6.pdf [file mmc6.pdf]

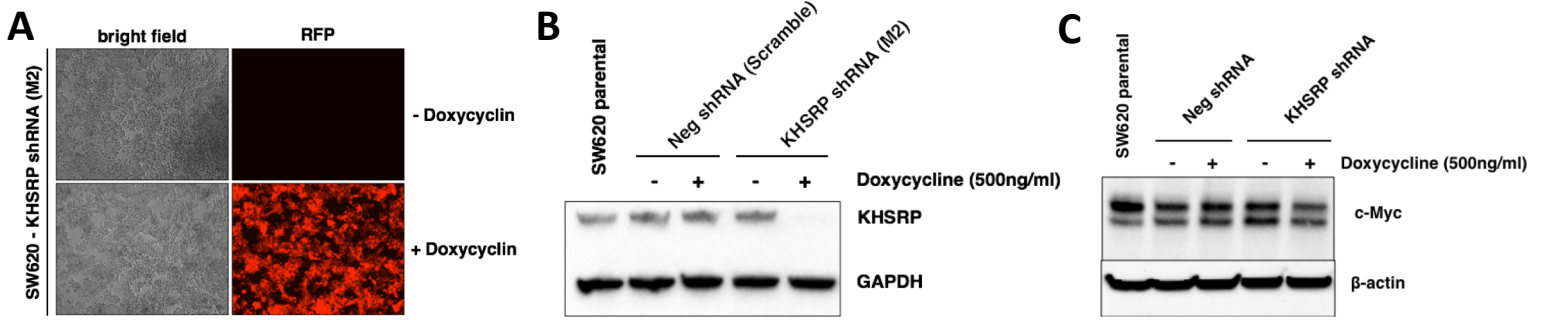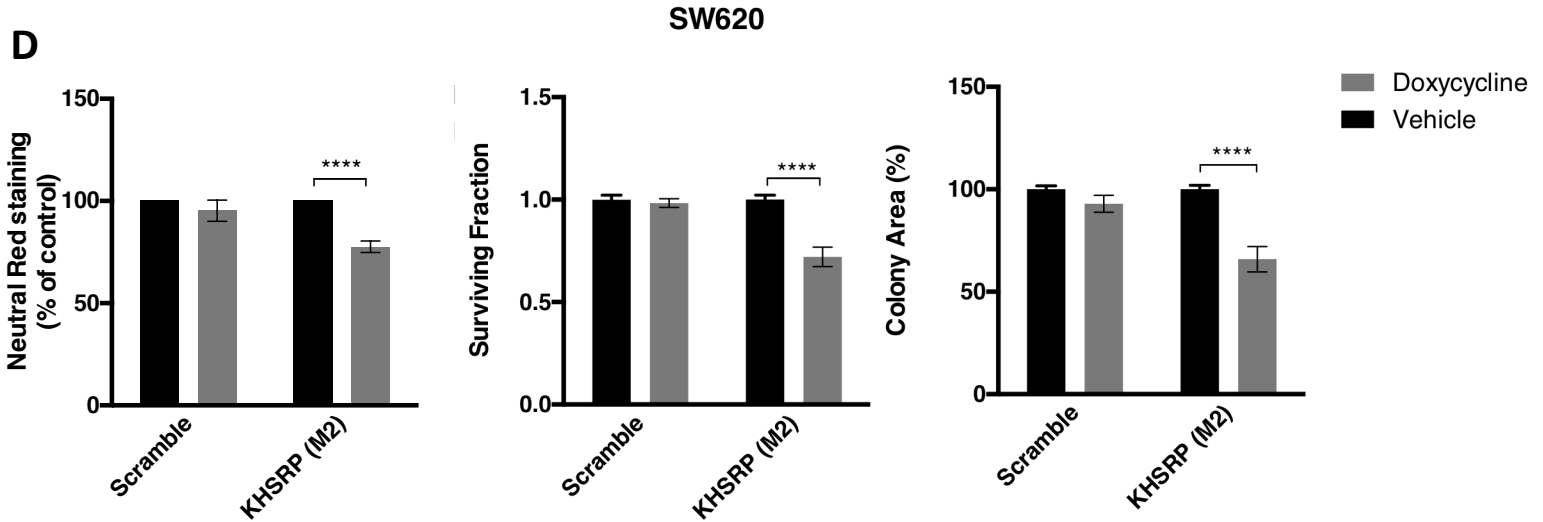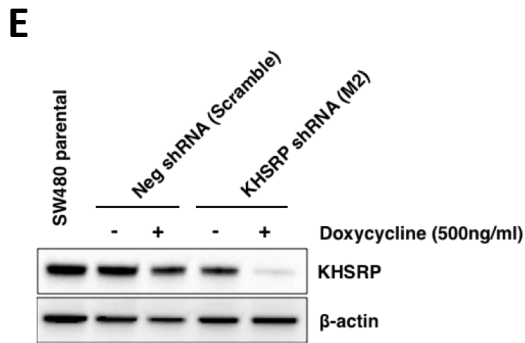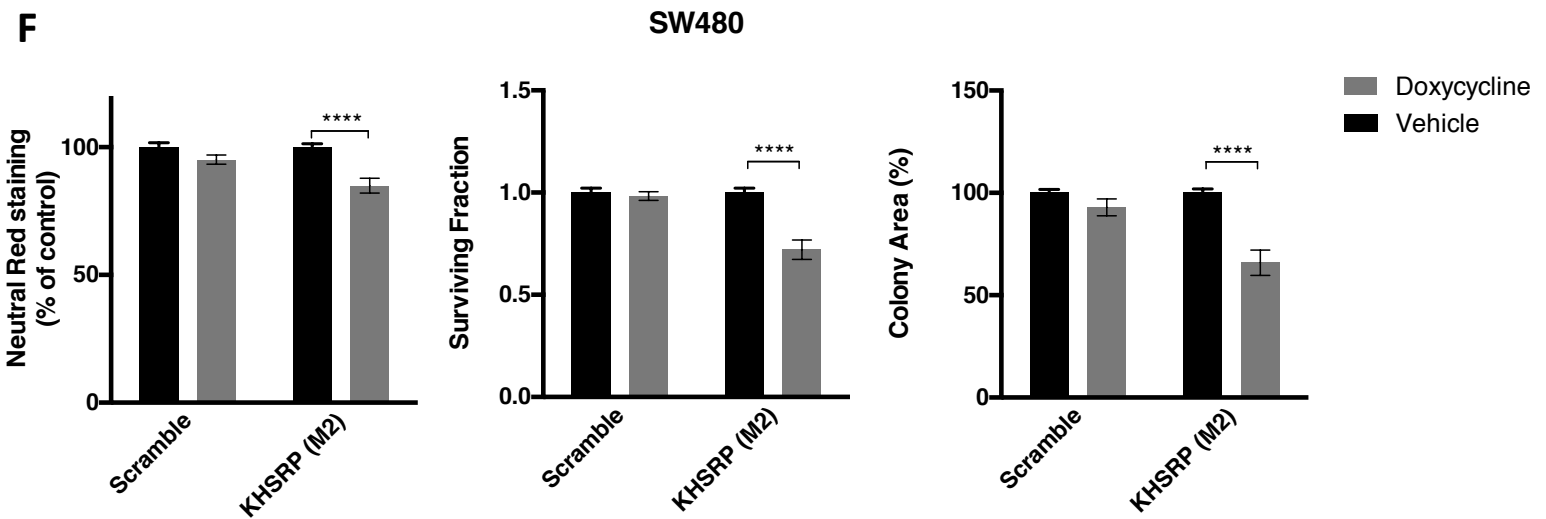

Supplement: mmc7.pdf [file mmc7.pdf]

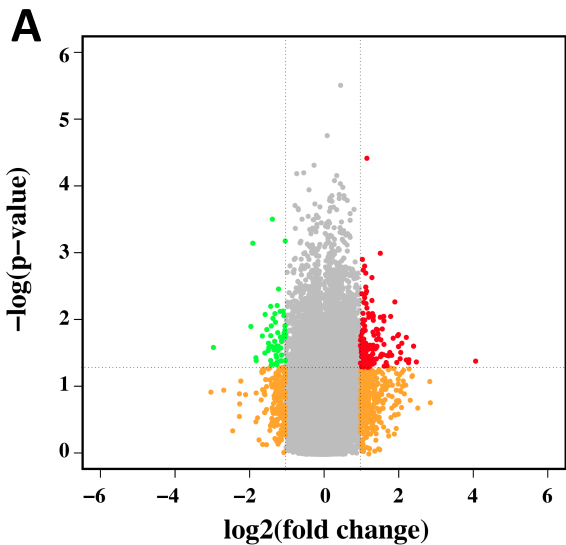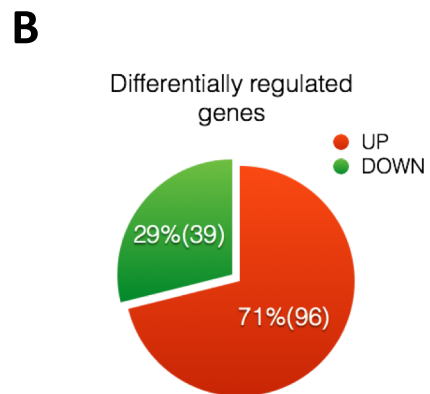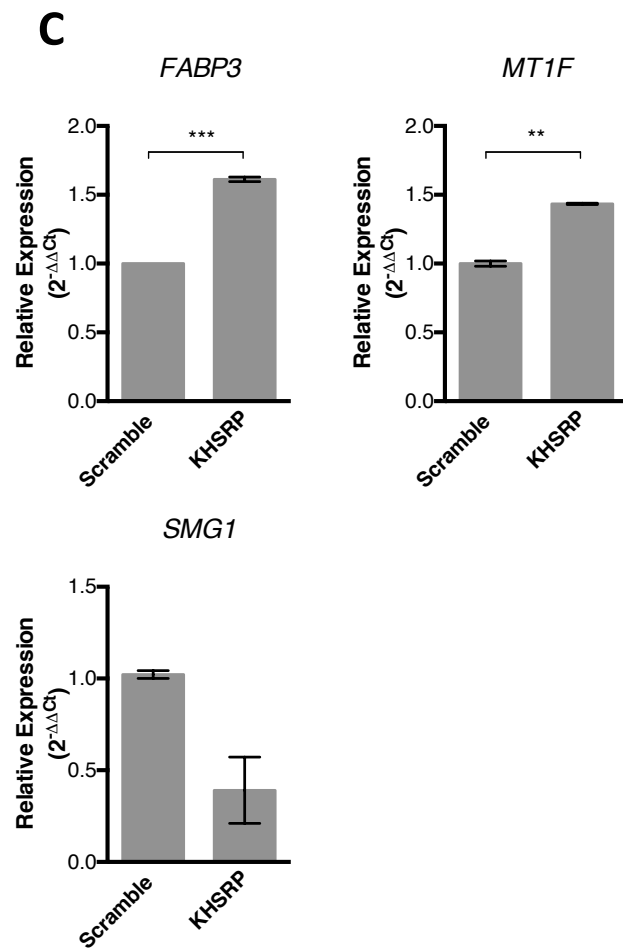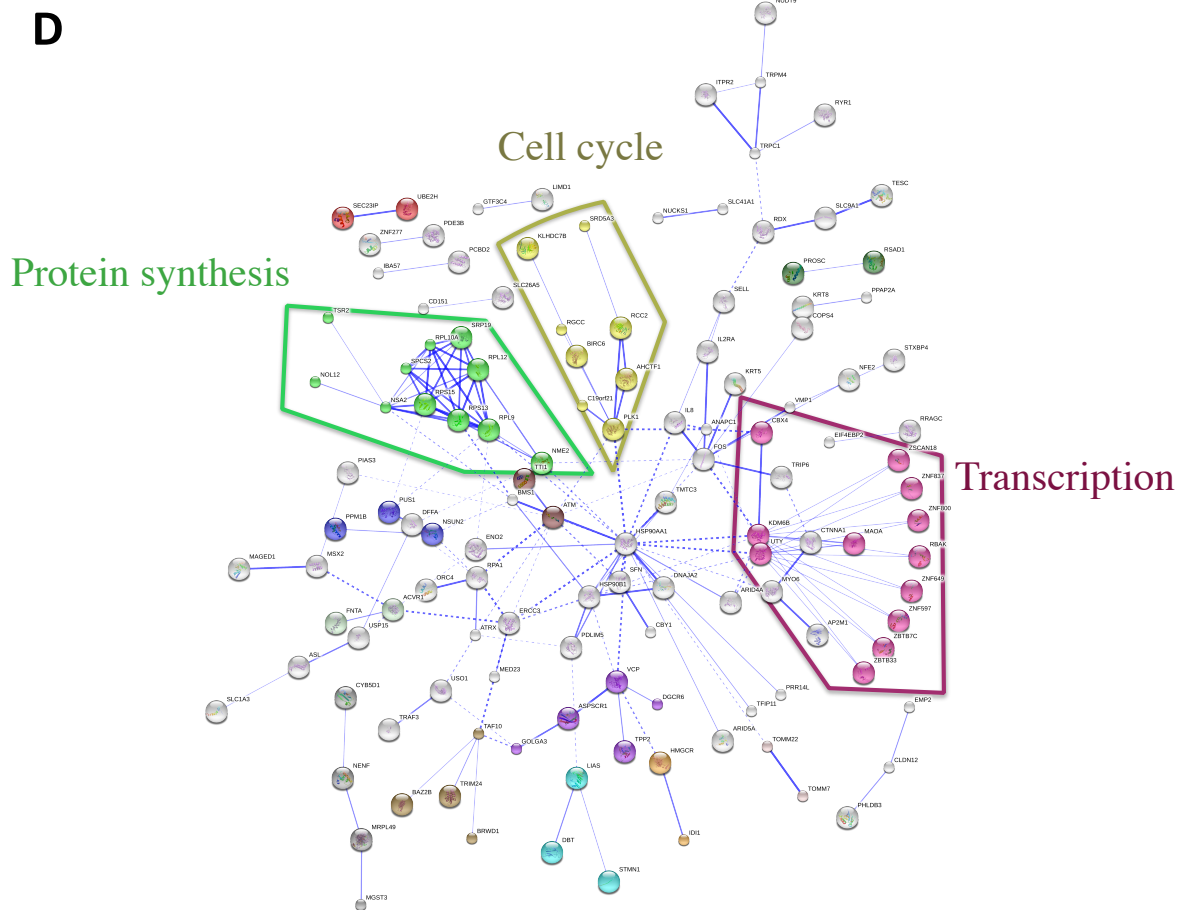

Supplement: mmc8.pdf [file mmc8.pdf]
